# Supplementary material
Source: publisher figshare collection journal article supplement (https://frontiersin.figshare.com/ndownloader/files/11870363)
Supplement: Supplementary file [file 11870363]

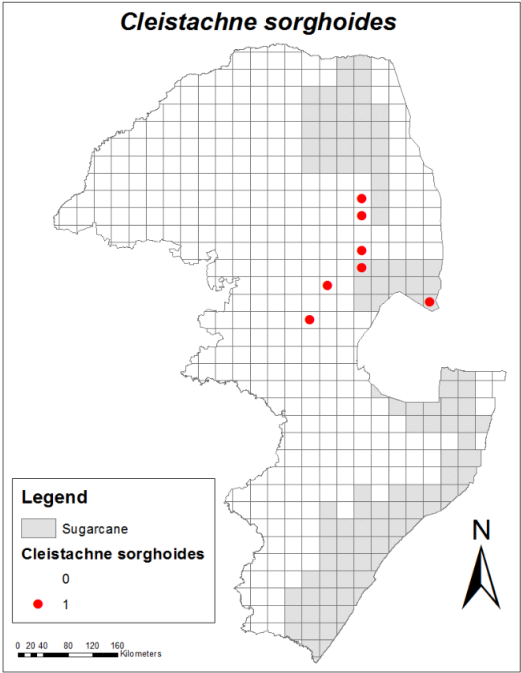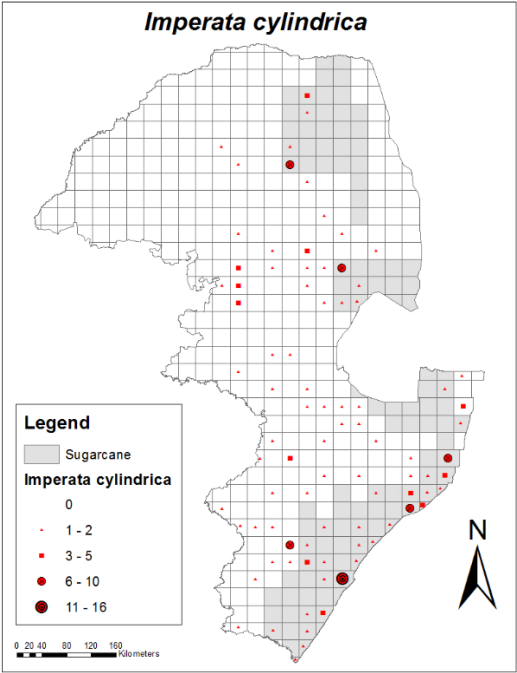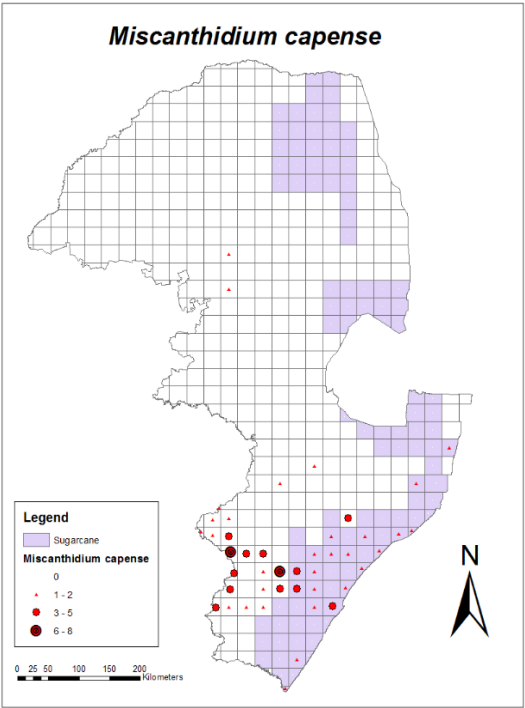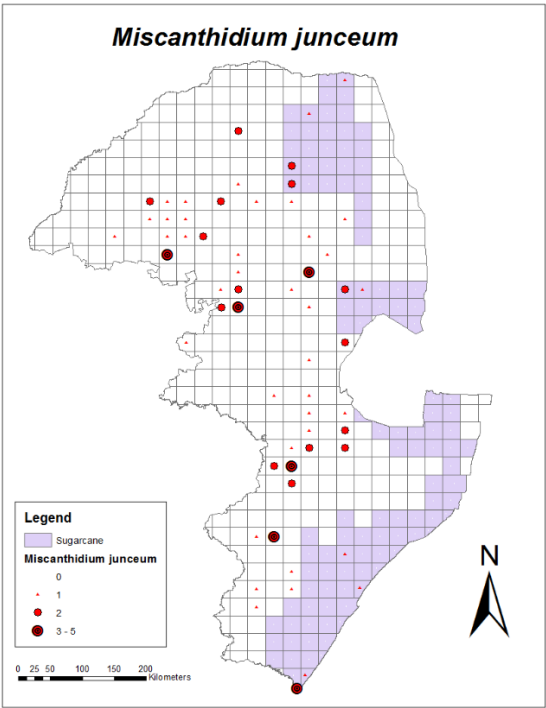

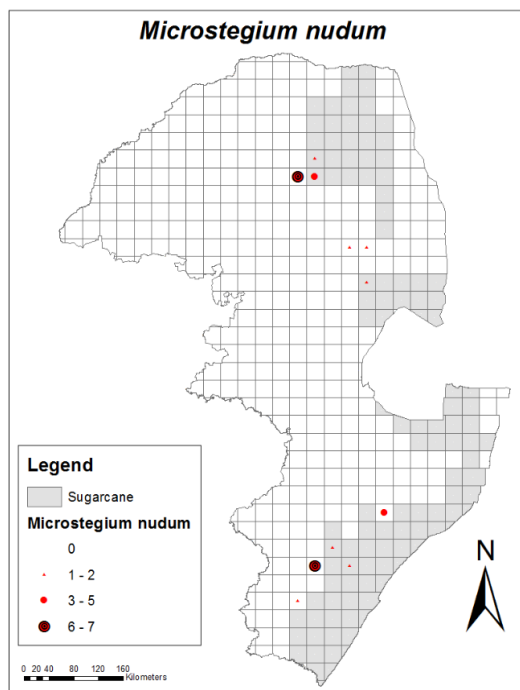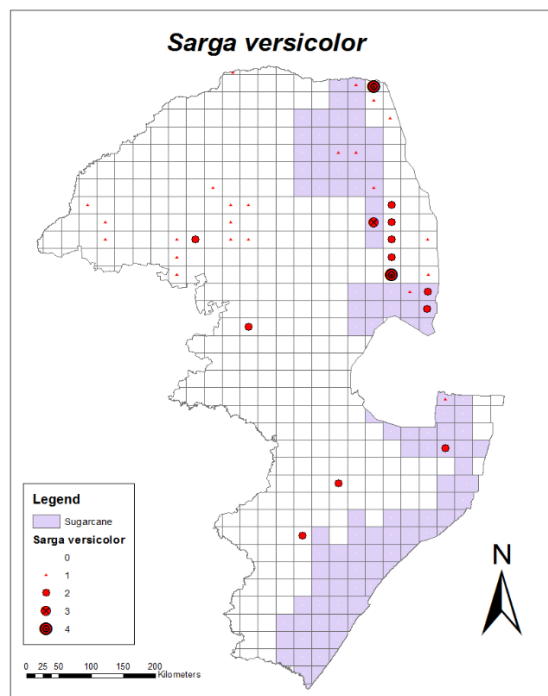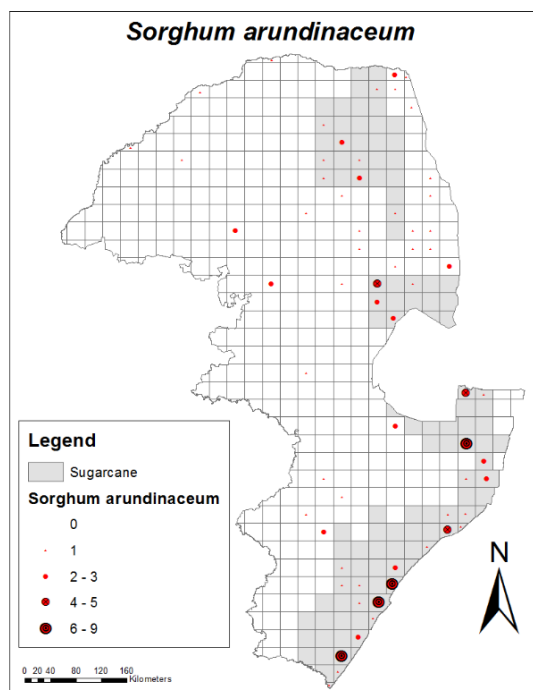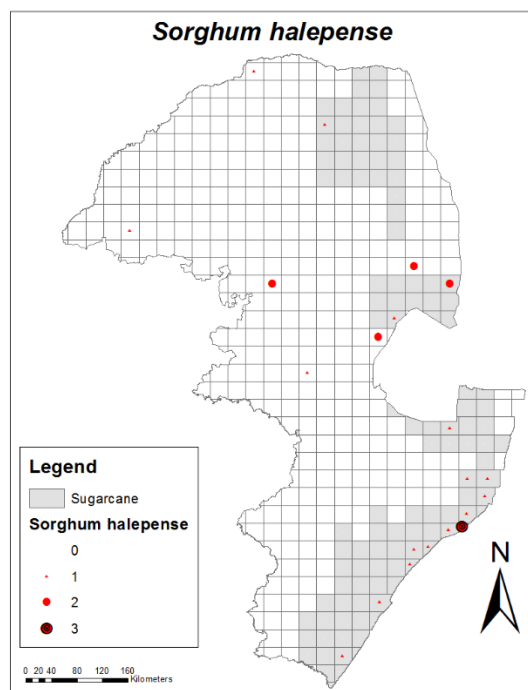

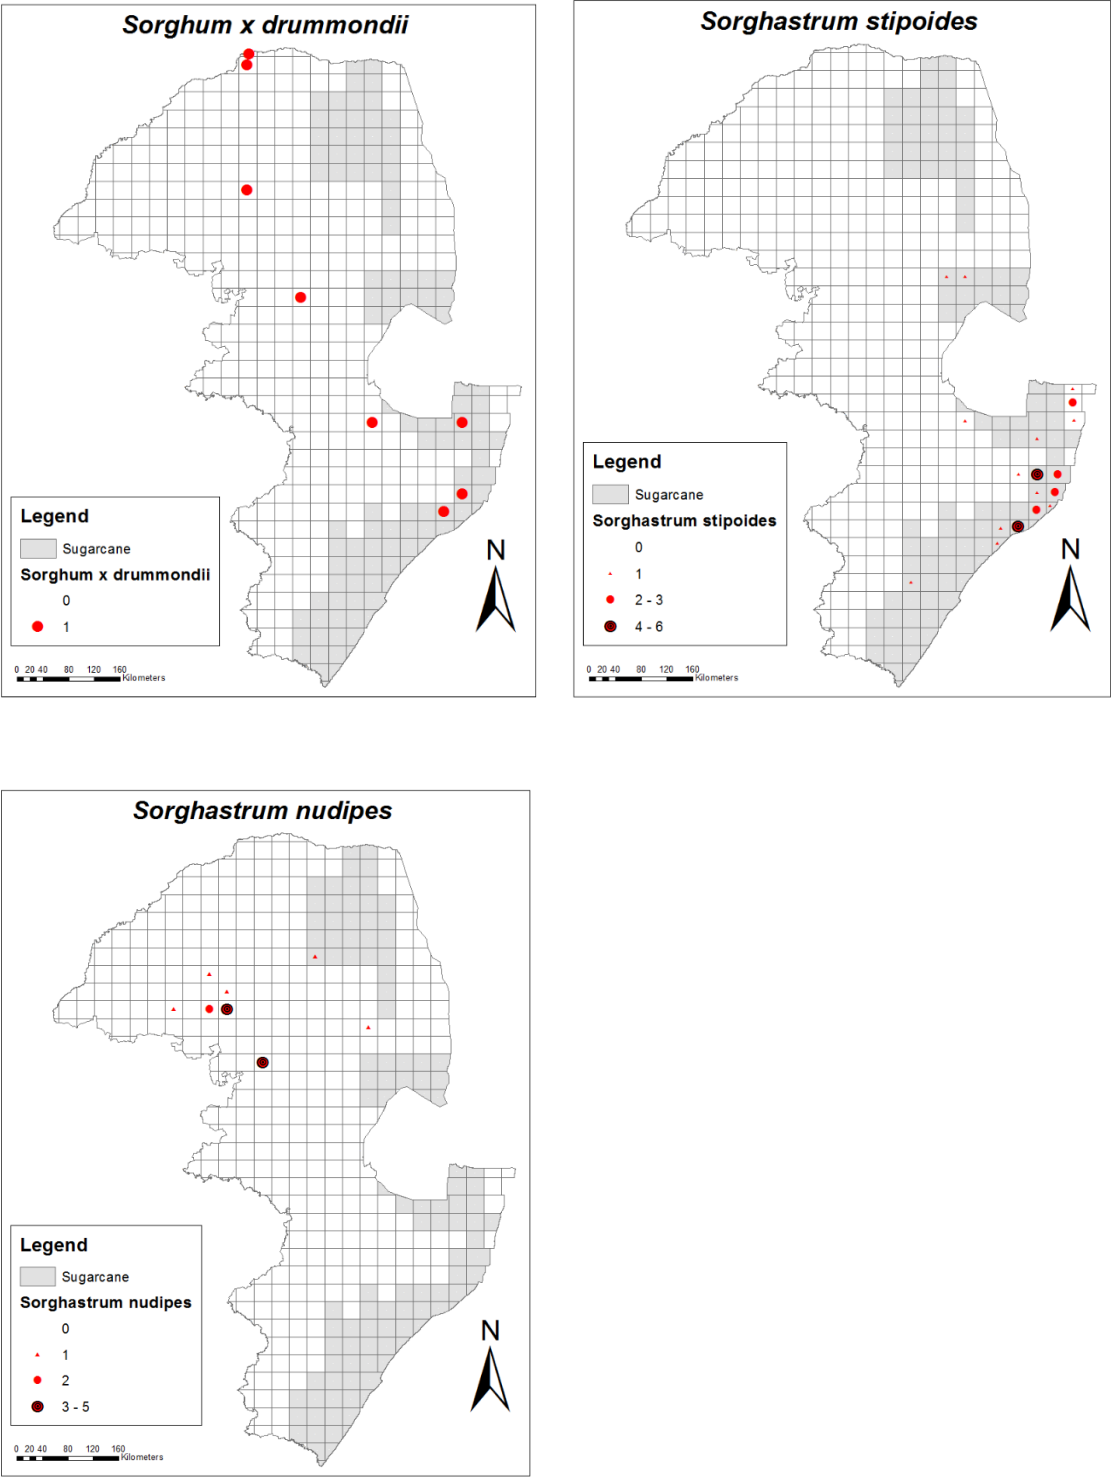

**Supplementary Figure 1.** Distribution map of each *Saccharum* hybrid wild relative.
